# Supplementary material for: Proteomic analysis identifies novel binding partners of BAP1
Source: PubMed Central journal article supplement (PMC8483321; doi:10.1371/journal.pone.0257688), 2021-09-30

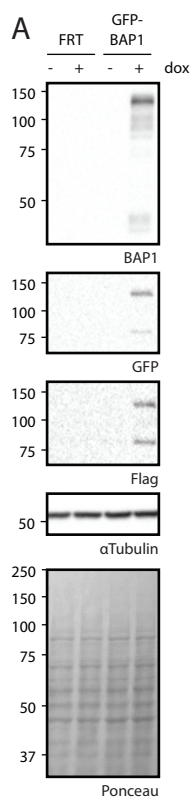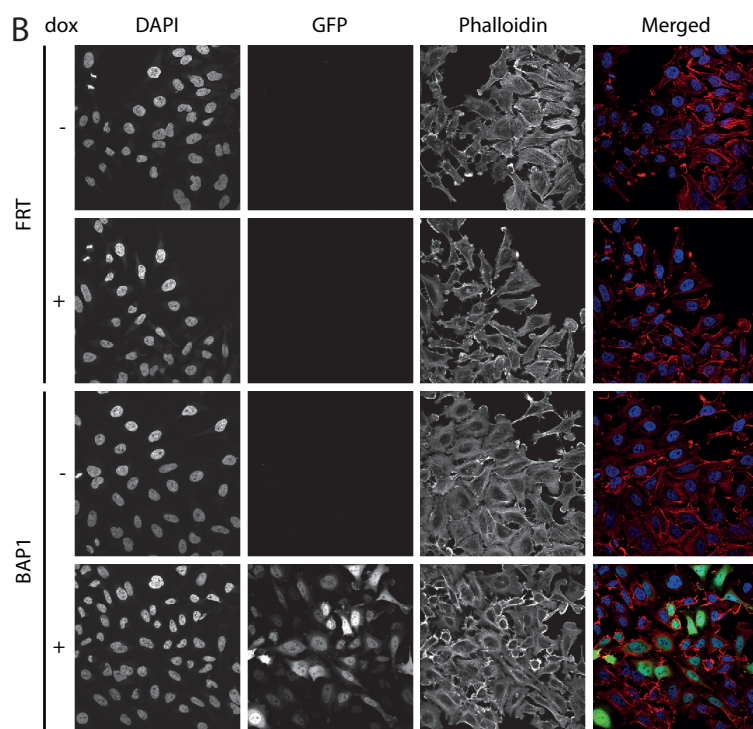

Supplement: pone.0257688.s001.pdf [file pone.0257688.s001.pdf]
